# Supplementary material for: Planting seeds for the future of food
Source: PubMed Central journal article supplement — J Sci Food Agric. 2016 Jan 5;96(5):1409–14. doi: 10.1002/jsfa.7554 (PMC5064658; doi:10.1002/jsfa.7554), 2016-01-05
Supplement: JSFA-96-1409-s001.pdf [file JSFA-96-1409-s001.pdf]

# PLANTING SEEDS FOR THE FUTURE OF FOOD

THE AGRICULTURE, NUTRITION  
AND SUSTAINABILITY NEXUS

Nestlé Research Center  
Lausanne, Switzerland  
June 2-3, 2015

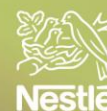

Research

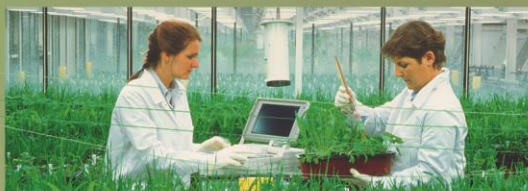

## Agenda

### TUESDAY, 2<sup>ND</sup> JUNE 2015

- 08:00 Bus departure in front of “Hotel Le Château d’Ouchy”, Lausanne
- 08:45 **Welcome by Prof. Stefan Catsicas**, Chief Technology Officer, Nestlé S.A.

### The Opportunities of Agriculture to Deliver Nutritious Ingredients for Food

- SESSION 1**
- 09:00 **Session Chair: Prof. Ruth K. Oniang’o**, Jomo Kenyatta University
- 09:15 **Dr. Howard Bouis**, Program Director, HarvestPlus
- 09:45 **Prof. Peter Shewry**, Rothamsted Research
- 10:15 **Prof. Ismail Cakmak**, Sabanci University
- 10:45 **Panel discussion**
- 11:45 **Buffet Lunch** (Foyer Pasteur)

### Ensuring Sustainability in Agriculture

- SESSION 2**
- 12:45 **Session Chair: Dr. Maurice Moloney**, Global Inst. Food Security
- 13:00 **Prof. Nina Fedoroff**, Penn State University of Science & Technology
- 13:30 **Mr. Liam Condon**, CEO of Bayer Crop Sciences
- 14:00 **Mr. Pierre Herben**, CTO, Yara
- 14:30 **Prof. Chris Somerville**, Director of Berkeley’s Energy Biosciences Institute
- 15:00 **Panel discussion**
- 15:30 **Break** (Foyer Pasteur)

### Major Technological Shifts for a More Efficient Agriculture

- SESSION 3**
- 16:00 **Session Chair: Prof. Ian Graham**, University of York
- 16:15 **Prof. Edward Buckler**, Cornell University, USDA
- 16:45 **Dr. David Fischhoff**, CTO Climate Corp
- 17:15 **Panel discussion**
- 17:45 Bus departure to “Hotel Le Château d’Ouchy”, Lausanne
- 19:00 **Cocktail & Formal Dinner** at the “Beau-Rivage Palace Hotel”, Ouchy

## WEDNESDAY, 3<sup>RD</sup> JUNE 2015

08:00 Bus departure in front of “Hotel Le Château d’Ouchy”, Lausanne

### The Specific Challenges of Agriculture in Emerging Countries

- SESSION 4
- 09:00 **Session Chair: Ted van der Put, IDH**
  - 09:15 **Dr. Robert Zeigler**, Director General, International Rice Research Institute (IRRI)
  - 09:45 **Dr. Nteranya Sanginga**, Director General, International Institute of Tropical Agriculture (IITA)
  - 10:15 **Break** (Foyer Pasteur)
  - 10:45 **Prof. Jennifer Thomson**, University of Cape Town
  - 11:15 **Panel discussion: Speakers + Jeremy Bird, IWMI**
  - 12:00 **Buffet Lunch** (Foyer Pasteur)

### Societal Support to the Transformation of Agriculture

- SESSION 5
- 13:00 **Session Chair: Dr. Josette Lewis**, World Food Center, UC Davis
  - 13:15 **Dr. Jason Clay**, Senior Vice President, WWF
  - 13:45 **Mr. Juan Gonzalez-Valero**, Head of Public Policy and Sustainability – Syngenta
  - 14:15 **Mr. Iain McGillivray**, Special Adviser to the President of IFAD
  - 14:45 **Panel discussion: Speakers + Annelot van Leeuwen**, Solidaridad

### Concluding Remarks

- 15:30 **Mr. José Lopez**, Chief Operations Officer, Nestlé S.A.
- 16:00 **End of conference**
- 16:15 Bus departure to “Hotel Le Château d’Ouchy”, Lausanne
